# Supplementary material for: The SARS-CoV-2 main protease Mpro causes microvascular brain pathology by cleaving NEMO in brain endothelial cells
Source: Research Square preprint supplement (doi:10.21203/rs.3.rs-86988/v1), 2020-10-14
Supplement: Supplementary file 1 [file 7f9a33b8b0db96eeb2f1e2fc.docx]

**The SARS-CoV-2 main protease Mpro causes microvascular brain pathology by cleaving NEMO in brain endothelial cells**

Josephine Lampe1,2*, Jan Wenzel1,2*, Helge Müller-Fielitz1*, Kristin Müller1,2, Raphael Schuster1, Linlin Zhang3,4, Marietta Zille1, Markus Krohn1,2, Ümit Özorhan1, Yun Jiang1, Vanessa Neve1, Anke Fähnrich5,6, Fabian Ott5,6, Sonja Binder1, Hauke Busch5,6, Ludovic Collin7, Roberto Villaseñor7, Olaf Jöhren1, Hermann Altmeppen8, Manolis Pasparakis9, Ruben Nogueiras10, Vincent Prevot11, Rolf Hilgenfeld3,4, Markus Glatzel8, Markus Schwaninger1,2

**Extended data**

**Online Methods**

**Patients**

The clinical details of SARS-CoV-2-infected and control patients are summarized in the Extended data Table 1. SARS-CoV2 infection was diagnosed by RT-PCR from pharyngeal swabs. Patients died in Hamburg and were autopsied at the University Medical Center Hamburg-Eppendorf (UKE). SARS-CoV-2-infected patients had been included in a previous study1. Control patients were matched for age and sex. Brains were fixed in buffered 4% formaldehyde, examined macroscopically, and underwent routine neuropathological workup. We analyzed 4-µm thick paraffin-embedded sections of the frontal lobe.

**Animals**

Mice were housed in individually ventilated Green Line cages (Tecniplast) under a 12-hour light/dark cycle and fed an autoclaved pelleted mouse diet *ad libitum*. We performed all studies in accordance with the German Animal Welfare Act and the corresponding regulations. Experimental procedures were approved by the local animal ethics committee (Ministerium für Landwirtschaft, Umwelt und ländliche Räume, Kiel, Germany). All mouse lines were established on a C57BL/6 background. In most experiments, littermate mice at the age of 8 to 15 weeks were used that were age- and sex-matched between experimental groups. For brain endothelial knockout of *Nemo* and *Fadd*, mice with the respective loxP flanked-alleles2,3 were crossed with the BAC-transgenic *Slco1c1*-CreERT2 strain4, which expresses the tamoxifen-inducible CreERT2 recombinase under the control of the mouse *Slco1c1* regulatory sequences in brain endothelial cells and epithelial cells of the choroid plexus. *Ripk3-/-* mice have been reported previously5. Tamoxifen (dissolved in 90% miglyol 812 with 10% ethanol, 50 mg/kg, i.p., twice per day for 5 consecutive days; Sigma-Aldrich) was injected to induce recombination. After receiving tamoxifen, *Nemofl/fl*; *Slco1c1*-CreERT2 mice were indicated as *NemobeKO*while control littermates lacking the Cre recombinase but receiving tamoxifen injection were termed as *Nemofl*. If not mentioned otherwise, mice were perfused 14 days after receiving the first dose of tamoxifen.

For microglia depletion, mice were fed the CSF1R inhibitor PLX5622-containing (1,200 ppm) AIN-76A rodent diet (D11100404i) 14 days prior to the start of tamoxifen injection. Controls received a control diet (OpenSource Diets, D10001i). Mice received pimonidazole HCl (100 mg/ml in 0.9% NaCl; Hypoxyprobe, Inc.) 1 hour prior to perfusion (i.p., 60 μg/g body weight).

Mice were randomly allocated to diet or treatment groups. Investigators were blinded for treatment or genotype or both whenever possible.

**Plasmid construction and AAV vector production**

The plasmid pCAG-Mpro-HA was synthesized by Vectorbuilder. It contains inverted terminal repeats of AAV2, the 1,733-bp long CAG promoter6, and the native SARS-CoV-2 sequence encoding for Mpro (gene ID 4375078). At the 5’-end we inserted a Kozak sequence and an ATG and at the 3’-end the sequence for an HA tag and a TAA codon followed by WPRE and the bovine growth hormone polyadenylation signal. We chose the C-terminus for tagging of Mpro because, at least in the case of the SARS-CoV enzyme, this side was less critical for enzymatic activity7,8. We produced AAV vectors by triple transfection of HEK293T cells. Cells were grown at 37 °C and 5% CO2 in Dulbecco's modified Eagle's medium (DMEM, Invitrogen, Carlsbad, CA) supplemented with 1% penicillin/streptomycin (Invitrogen) and 10% fetal calf serum (FBS, Biochrom US Inc, Holliston, MA). HEK293T cells were transfected with plasmid DNA using the calcium phosphate method9,10. For transfections, we used pxx6 as adenoviral helper plasmid11, pCAG‐Mpro-HA and pAAV‐CAG‐GFP12 (both containing inverted terminal repeats of AAV2), and the plasmid p187 encoding the endothelial cell specific AAV‐BR1 capsid13. Three days after transfection, cells were harvested, lysed in TNT extraction buffer (20 mM Tris‐HCl [pH 7.5], 150 mM NaCl, 10 mM MgCl2, 1% Triton X‐100), and the vectors purified by affinity column using sepharose columns (Hi Trap AVB sepharose; GE Healthcare, Little Chalfont, UK). We determined the genomic titer by quantitative PCR (qPCR) using primers against WPRE (forward primer: 5′-TGC CCG CTG CTG GAC-3′; reverse primer: 5′-CCG ACA ACA CCA CGG AAT TG-3′) or GFP (forward primer: 5′-TGA CCC TGA AGT TCA TCT GC-3′; reverse primer: 5′- AAG TCG TGC TGC TTC ATG TG-3′). Vectors were injected in the tail vein of mice (1.8 x 1011 genomic particles per mouse, 100 µl). Mice were perfused with PFA (4%) two weeks after administering the vector. For quantification of vectors in the brain, total DNA of 4 sagittal brain sections (each 20 µm thick) were extracted using the DNeasy tissue kit (Qiagen) according to the manufacturer’s instructions. We quantified DNA with a spectral photometer (Nanodrop ND-2000C, Peqlab) as described previously10.

**Cell culture and transfection**

The human brain endothelial cell line hCMEC/D3 (Merck #SCC066, RRID: CVCL_U985) was cultured on plates coated with rat collagen type I (0.2 mg/ml in PBS, Sigma) in EndoGRO-MV medium (Merck #SCME004). The mouse brain endothelial cell line bEnd.3 (ATCC, CRL-2299, RRID:CVCL_0170) was kept in DMEM medium containing 4.5 g/l glucose (PAN Biotech), 1% penicillin-streptomycin, and 10% FBS. We used 24-well plates for luciferase assays, 48-well plates for immunocytochemistry, and 12-well plates for immunoblotting. After withdrawing heparin or penicillin-streptomycin from the medium, we transfected the cells at 60-90% confluence using Lipofectamine 3000 (Thermo Fisher Scientific) and the following plasmids: pNFkB-Luciferase (200 ng per well; Stratagene), pCAG-Mpro-HA (400 ng/well on 24-well and 48-well plates; 1,000 ng/well on 12-well plates), pCAG-NEMO-2A-eGFP (1,000 ng/well on 12-well plates)13, pRL-SV40 (40 ng/well). The DNA was filled up with pBluescript to equal amounts per well. One day after lipofection, we treated the cells with IL-1β (0.25 µg/ml, Peprotech) and measured luciferase activity using the Dual Luciferase Reporter Assay (Promega) after 6 hours. Immunocytochemistry of p65 or the TUNEL reaction were performed after stimulating cells for 30 min with IL-1β (0.25 µg/ml) or for 4.5 h with TNF (100 ng/ml), 2 to 3 days after transfection. For immunoblotting, we lysed cells 3 days after transfection.

**Single-cell RNA sequencing**

Two 10-weeks old male C57BL/6 mice were killed by decapitation. The hypothalamic region was microdissected under a binocular microscope. For this, incisions were made 1 mm lateral of the third ventricle, anterior of the optic chiasm and posterior of the caudal end of the third ventricle. This block was digested with the Papain Dissociation System (Worthington; LK003150). The tissue was incubated in L-15 media on ice until the collection of the brains was finished. The medium was removed and papain/DNase solution (700 µl, Papain Dissociation System) was added and incubated at 37 °C in a water bath. After 15 and 30 min, the solution was gently triturated (pipetting 10-times with a P1000 and 10 times with a P200 pipette). After centrifuging the cell suspension (5 min, room temperature, 700 *g*), we removed the supernatant. We resuspended the cell pellet in inhibition solution (500 µl EBSS, 56 µl RAOI and 28 µl DNase, Papain Dissociation System) and passed it through a 40-µm cell strainer. After a second centrifugation step (5 min, room temperature, 700 *g*), we resuspended the cell pellet in HBSS solution containing 5% glucose and stored it on ice.

Single-cell capture was achieved by random distribution of the single-cell suspension across >200,000 microwells through a limited dilution approach with the BD Rhapsody system. Cells were sorted as described in the manufacturer’s protocol (Manual: single cell capture and cDNA synthesis; BD Rhapsody cartridge reagent kit 633731). Beads with oligonucleotide barcodes were added to saturation so that a bead was paired with a cell in a microwell14. In total, 20,448 viable cells were captured. Then, we added cell lysis buffer so that poly-adenylated RNA molecules hybridized to the beads. We collected beads into a single tube for reverse transcription. Upon cDNA synthesis (BD Rhapsody cDNA kit; 633773), each cDNA molecule was tagged on the 5′ end (that is, the 3′ end of a mRNA transcript) with a molecular index and cell label indicating its cell of origin14. Whole transcriptome libraries were prepared with half of the beads using the BD Resolve single-cell whole-transcriptome amplification workflow (BD targeted and AbSeq Amplification Kit; 633774) with a randomer primer pool (tcagacgtgtgctcttccgatctNNNNNNNNN). In brief, second-strand cDNA was synthesized, followed by the ligation of the adaptor for universal amplification. Eighteen cycles of PCR were used to amplify the adaptor-ligated cDNA products. Libraries were quantified using a High Sensitivity DNA chip (Agilent) on a Bioanalyzer 2100 and the Qubit High Sensitivity DNA assay (Thermo Fisher Scientific). Libraries were sequenced using High Output sequencing kits (75× 2bp) (Illumina) by a commercial provider (Novogene).

**Bioinformatic analysis of single-cell RNA sequencing data**

Raw gene expression matrices were generated for each sample by a custom pipeline combining kallisto (v.0.46.1) and bustools (v.0.46.1) coupled with mouse reference version GRCm38. The output filtered gene expression matrices were analyzed by R software (v.4.2.0) with the DropletUtils (v.1.8.0) and Seurat package (v.3.2.0). In brief, for each sample, cells were detected by ranking cell barcodes according to their number of unique molecular identifiers (UMIs) captured using the barcodeRanks function. Low ranked cells from this process were labeled as false positives and were discarded.

Only genes expressed in > 0.5% of the dataset and cells with > 200 genes assigned were selected for further analyses. Low-quality cells were removed if they included > 20% UMIs derived from the mitochondrial genome. Gene expression matrices were normalized by the NormalizeData function and 2,000 features with high cell-to-cell variation were calculated using the FindVariableFeatures function. For both samples, we identified ‘anchors’ between individual datasets with the FindIntegrationAnchors function and fed these anchors into the IntegrateData function to create a batch-corrected expression matrix of all cells, which allowed cells from different datasets to be integrated and analyzed together. To reduce the dimensionality of the dataset, the RunPCA function was conducted, calculating 30 principal components on linear-transformation scaled data generated by the ScaleData function. Next, the ElbowPlot and DimHeatmap functions were used to identify the true dimensionality of the dataset and to remove noise, as recommended by the Seurat developers. Finally, we clustered cells using the FindNeighbors and FindClusters functions and performed nonlinear dimensionality reduction with the RunUMAP function on 30 dimensions. All details regarding the Seurat analyses performed in this work can be found in the website tutorial (https://satijalab.org/seurat/v3.2/pbmc3k_tutorial.html). After non-linear dimensional reduction and projection of all cells into two-dimensional space by UMAP, cells were clustered together according to common features. The FindAllMarkers function in Seurat was used to find markers for each of the identified clusters. Clusters were then classified and annotated based on expressions of canonical markers of particular cell types.

**Proteolytic cleavage of NEMO**

The Mpro protein was generated as we have described recently15. Briefly, we transformed the *E. coli* strain BL21-Gold (DE3, Novagen) with a specific construct that encodes for the protease including a PreScission protease cleavage site followed by a His-tag. An authentic N-terminus was generated during gene expression by auto-cleavage of Mpro, and the authentic C-terminus after treatment with PreScission protease. The purified protein was stored at -80°C in protease buffer (20 mM Tris, 150 mM NaCl, 1 mM EDTA, 1 mM DTT, pH 7.8) until usage.

For immunoblotting, recombinant human NEMO with an N-terminal GST tag (4.1 µg, ab206008, Abcam) was incubated with Mpro at the indicated concentrations and time points in protease buffer. For mass spectrometry, NEMO was incubated with Mpro (5 µM) in protease buffer for 3 hours at 37 °C and samples were lyophilized. Tryptic in-solution digestion was performed as described previously16. Briefly, after resuspending samples in 50 µl 6 M urea, a reduction was performed using 2.5 mM DTT (in 100 mM NH4HCO3) at 56 °C for 20 min and samples were alkylated using 7.4 mM iodoacetamide (in 100 mM NH4HCO3) for 30 min at room temperature in the dark. For tryptic digestion, first NH4HCO3 (425 µl, 100 mM) and then trypsin solution (sequencing grade, 1.5 µl, 0.05 µg/µl in 50 mM acetic acid, Promega Corporation) were added. After incubation for 18 h at 37 °C, samples were desalted using C18 solid-phase extraction (SPE) cartridges (Sep-Pak®, Waters Corporation) and resuspended in 30 µL 0.1% formic acid for LC-MS/MS.

To validate the cleavage of human and mouse NEMO at Q231, synthetic peptide substrates, termed h-NEMO_222-241 (EEKRKLAQL**Q**VAYHQLFQEY), h-NEMO-Q231A_222-241 (EEKRKLAQL**A**VAYHQLFQEY), m-NEMO_222-241 (EEKRKLAQLQAAYHQLFQDY), and reference h-NEMO_222-231 (EEKRKLAQLQ), consisting of the native or mutated human or mouse NEMO sequence, were commercially obtained (Peptide Specialty Laboratories GmbH). Peptide substrates (10 µM) were incubated with Mpro (2.5 µM) for 1 hour at 37 °C in water. We precipitated proteins using ice-cold acetonitrile and then kept samples at -20 °C for 10 min followed by centrifugation (4 °C, 20,817 *g*, 10 min). The supernatant was lyophilized and samples were dissolved in 30 µl 0.1% formic acid and further diluted 1:1 with 0.1% formic acid for LC-MS/MS. To determine the apparent catalytic efficiency, Mpro (2.5 µM) was incubated with different concentrations of h-NEMO_222-241 (2, 4, 6, 8, 10, 12, 14, 16 µM) for 30 min at 37 °C in protease buffer and samples were processed as described above. Previous experiments had shown that within the first 30 min cleavage depended linearly on the incubation time.

**Immunoblotting**

Samples were supplemented 1:4 with SDS buffer (0.75 M Tris-HCl; 0.08 g/ml SDS, 40% glycerol, 0.4 mg/ml bromophenol blue, 62 mg/ml DTT) and incubated at 95 °C for 10 min. After loading on SDS-PAGE gels, we transferred proteins to nitrocellulose membranes, which then were incubated with primary antibodies (Extended data Table 2) overnight at 4 °C. Subsequently, we incubated membranes with HRP‐conjugated secondary antibodies (Extended data Table 3) for 2 hours at room temperature. For detection, we utilized enhanced chemiluminescence (SuperSignal West Femto Substrate, Thermo Scientific) and a digital detection system (Fusion Solo S, Vilber).

**Mass spectrometry**

Analyses were performed on a UHPLC system (Dionex Ultimate 3000, Thermo Scientific) coupled to a quadrupole orbitrap mass spectrometer (Orbitrap Q-Exactive, Thermo Scientific). We separated the samples on a C18 reversed-phase separation column (ACQUITY UPLC® BEH C18, 130 Å, 1.7 µm, 2.1 x 100 mm, Waters Corporation) using H2O and acetonitrile (LC-MS grade, Merck KGaA), both containing formic acid (0.1%), as eluents at a flow rate of 200 µl/min. We employed stepwise and linear gradients: For tryptic NEMO peptides, 3 - 45% B in 43 min, 45 - 70% B in 7 min; for synthetic NEMO peptides, 3 - 70% B in 10 min. All spectra were acquired in positive ion mode and capillary voltage was set to 3,500 V, capillary temperature to 320 °C, sheath gas flow to 30, and auxiliary gas flow to 10. Full scan spectra were acquired with a scan range of 150 - 2,000 m/z (tryptic NEMO peptides) or 400 - 2,000 m/z (synthetic NEMO peptides) and the resolution was set to 70,000, AGC target to 3 x 106, and maximum injection time to 100 ms. Precursor selection was performed using an isolation window of 2.0 m/z and a dynamic precursor exclusion of 10 s. Ions of charge states 1+ and >6+ were excluded from fragmentation. We fragmented isolated ions using higher-energy collisional dissociation (HCD) and a stepped normalized collision energy of 30. MS/MS spectra were acquired with a resolution of 17,500, AGC target was set to 105, and the maximum injection time to 50 ms. Data analysis was performed using the Xcalibur software (version 3.0.63, Thermo Scientific). For identification of NEMO-derived peptides, a database search using the MaxQuant software (version 1.6.1.0, Max Planck Society) with the Andromeda search engine was performed. We searched raw data against a human NEMO database (www.uniprot.org, July 2020). Digestion mode was set to unspecific, minimum peptide length to 3, precursor tolerance to 4.5 ppm, MS/MS tolerance to 0.5 Da, and carbamidomethylation of cysteine residues was used as fixed modification.

**Immunofluorescence stainings and confocal microscopy**

For the staining of human brain tissue, sections were deparaffinized in xylene and ethanol and rehydrated in water. The sections were rinsed in 0.1% Triton X-100 in PBS for 10 min and 0.1% Tween-20 in PBS for 5 min. To retrieve antigens, we incubated the sections in sodium citrate buffer (10 mM, pH 6, 95 °C, 10 min) and allowed the sections to cool down for 20 min. After washing in PBS 3 times for 3 min, the sections were blocked in PBS containing 5% bovine serum albumin (BSA) and 0.1% Triton X-100 for 30 min. Primary antibodies (Extended data Table 2) diluted in blocking solution were incubated at 4 °C overnight. After washing 3 times for 5 min in PBS the next day, secondary antibodies (Extended data Table 3) diluted in blocking solution were incubated at room temperature for 1 hour in the dark. Sections were rinsed 3 times for 5 min in PBS, incubated with DAPI (1 µg/ml in PBS) for 5 min followed by washing twice in PBS for 5 min. Sections were mounted using MOWIOL.

For the staining of cryosections of mouse brains, we perfused mice under deep anesthesia with PBS containing heparin (10 IU/ml). Brains were frozen on dry ice and stored at -80 °C. Sections (20 µm thick) were cut at -20 °C and post-fixed in methanol for 10 min at -20 °C or in 4% PFA in PBS for 15 - 20 min at room temperature, if not indicated otherwise. Specimen were blocked with either 1 - 3% BSA in PBS (methanol post-fixation) or 1 - 3% BSA and 0.1 - 0.3% Triton X-100 in PBS (PFA post-fixation) for one hour and incubated with primary antibodies (Extended data Table 2) in blocking buffer overnight at 4 °C. After incubation with secondary antibodies (Extended data Table 3) for 1 - 2 hours at room temperature, coverslips were sealed using MOWIOL.

For vibratome sections, mice were perfused with freshly prepared PFA (2% in PBS, 4% for GFP staining) after perfusion with PBS. Brains were postfixed in 2% PFA in PBS for 7 hours (4% PFA for 2 hours for GFP staining) at 4 °C before sectioning using a vibratome (Leica VT1200S). Sections (100 µm thick) were blocked with 3% BSA in PBS containing 0.1-0.3% Triton X-100 for 6 hours at room temperature and incubation with primary antibodies (Extended data Table 2) was performed at 4 °C for 48-72 hours, incubation with secondary antibodies (Extended data Table 3) was performed in blocking solution at 4 °C overnight.

For TUNEL assay, brains were postfixed in 4% PFA in PBS at 4 °C overnight and transferred to a 30% sucrose solution the next day. On the following day, brains were frozen and stored at -80 °C. Cryosections (40 µm thick) were prepared and a heat-induced epitope retrieval using a 10 mM sodium citrate buffer at 95 °C for 20 min was performed. TUNEL assay was applied after immunohistochemistry staining according to the manufacturer’s kit information (In Situ Cell Death Detection Kit – Fluorescein, Roche, #11684795910).

Images were taken by confocal laser scanning microscopes (Leica, SP5 or SP8) or a fluorescence microscope (Leica, DMI 6000B). Images for determining the number of string vessels in human samples as well as super-resolution images were taken using a STED microscope, custom made by Abberior Instruments (Abberior Instruments GmbH, Germany) build around an upright Olympus BX61WI-F body. For string vessel counting, samples were imaged using a 20x objective (Olympus UPLFLN), 640-nm, and 485-nm pulsed diode excitation lasers, APD detection windows set to 650-763 nm and 498-571 nm, respectively, and the pinhole set to 2.6 airy units. All images were produced using the same setting. Exemplary detail images were produced using a 100x (Olympus UPlanSApo, 1.4NA) with the pinhole set to 0.4 airy units and RESCue® adaptive illumination to reduce photobleaching at an optimal signal to noise ratios. A QUADScan (Abberior Instruments GmbH, Germany) beam scanner was used for xy-scanning and a PIFOC® focus drive for z-scanning.

**Super-resolution microscopy**

We used stimulated emission depletion (STED) imaging and expansion microscopy. For STED, 640-nm, 561-nm diode excitation lasers, a 775-nm STED laser, all pulsed at 40 MHz, and a 100x (Olympus UPlanSApo, 1.4NA) were utilized. A spatial light modulator (Hamamatsu) was used to produce either a doughnut-shaped (2D-STED) or a top-hat (3D-STED) phase mask, shaping different depletion beams without changing the optical setup. To reduce photobleaching at an optimal signal to noise ratios we employed DyMIN® adaptive illumination.

For expansion microscopy, after immunofluorescence staining, vibratome sections were incubated with methacrylic acid N-hydroxy succinimidyl ester (1 mM in PBS) for 1 hour at room temperature. After washing in PBS, monomer solution (2 M NaCl, 2.5% acrylamide, 0.15% methylenebisacrylamide, 8.625% sodium acrylate) was added for 45 min at room temperature. Gelation was started by adding a mixture of monomer solution with APS (0.2 %), TEMED (0.2 %), and TEMPO (0.01 %) for 2 - 2.5 hours at 37 °C in a humidified environment. Then, the samples were incubated in digestion buffer (0.5% Triton X-100, 0.8 M guanidine HCl, 8 units/ml proteinase K in 1x TAE buffer) at 37 °C overnight. On the following day, we expanded the sections 3 - 4 times in distilled water for 20 min and embedded in agarose (0.8% water). Images were taken with an HC PL APO CS2 40x/1.10 water objective. Expansion microscopy was used for qualitative representation of occludin and ZO-1 morphology.

**Quantitative analysis of immunostainings**

To analyze IgG transcytosis, z stacks of approximately 9 µm were taken with an HCX PL APO CS 63x/1.4 oil objective. Deconvolution was performed by Huygens Software (Scientific Volume Imaging). Then, IgG+ vesicles were counted using Imaris 9.3.0 (Bitplane, Belfast, UK). First, 3D vasculature masks were created from either collagen IV immunostaining and smoothed under 0.8 µm surface details using the “Surface” function. Using the “Spots” function, vesicles were identified by using the Imaris filter “Quality” and an estimated diameter of 0.5 µm. To determine IgG extravasation, we measured the IgG intensity outside of the vasculature mask. IgG+ vesicles and IgG extravasation were quantified on 10 - 15 images per animal.

String vessels and their localization in the vascular tree, vessel length, vessel diameter, occludin interruptions, and GFAP+ astrocytes were analyzed using ImageJ (National Institutes of Health, RRID:SCR_002285). Mouse string vessels were defined as empty basement membrane tubes negative for the endothelial cell marker CD31, but positive for the basement membrane marker collagen IV. The length and number of all CD31-/collagen IV+ vessels were measured and normalized for the total length or the total number of vessels. For vascular tree analysis, string vessels were counted manually and tracked in tile scans of the cortex, hippocampus, and hypothalamus. As the starting point of the vascular tree, we chose α-SMA+ vessels, which is mainly expressed in arterioles and arteries. GFAP+ astrocytes were quantified as the percentage of the GFAP+ area relative to the total area of the image. Because CD34 staining was very unreliable in human brain sections, human string vessels were identified as collagen IV+ tubes of < 4 µm apparent outer diameter in images produced by confocal laser scanning microscopy. Since the theoretical minimal diameter for a functional capillary is 2.7 µm and more than 90% of brain capillaries in aged humans have an inner diameter of > 3.5 µm, we expect this threshold to be selective for string vessels17,18. Quantifications were obtained from 4-6 images per animal or 10 images per patient. Vessel diameter was measured by using the DiameterJ plugin. Images were taken from the cortex if not stated otherwise.

Pericyte coverage was analyzed using MotionTracking software (MPI-CBG, v8). In general, the CD13+ area inside the collagen IV+ vessels was normalized to the total collagen IV+ area. For quantitative analysis of occludin interruptions, 15 images per animal were taken with an HC PL APO 40×/1.3 oil objective. For measuring occludin interruptions, the length of occludin and ZO-1 tight junctions were traced manually by using the Simple Neurite Tracer plugin. Then, occludin length was normalized to ZO-1 length.

For the soma size measurement of Iba-1+ cells, 25 steps, 0.99 µm step size images were taken. Maximal intensity Z stacks were generated using ImageJ. A threshold was applied (Li autothreshold), converted to a mask, and speckles and outliers removed. Then, all the processes were removed from the soma and the soma area was measured for 15 microglia per sample.

**Statistical analysis**

Data were analyzed using GraphPad Prism 8 (GraphPad Software) and SPSS 25 (IBM). Significance was considered when *p* < 0.05. Depending on the dataset and experimental design, different statistical methods were used as indicated in the figure legends. Parametric statistics (e.g., t-Test, ANOVA) were only applied if assumptions were met, i.e. datasets were examined for Gaussian distribution by D’Agostino-Pearson test, aided by visual inspection of the data, and homogeneity of variances by Brown-Forsythe, Levene’s or F-test (depending on the statistical method used). If assumptions for parametric procedures were not met or could not be reliably assumed due to small sample size, non-parametric methods were used as indicated.

**Extended data Table 1: Clinical characteristics of patients.** IDs refer to the matching of the patients between the groups. Sex:m, male; f, female. Place of death: ER, emergency room; hosp., hospital ward; ICU, intensive care unit; NH, Nursing home. PMI, postmortem interval. Comorbidities: AML, acute myeloid leukemia; CI, cardiac insufficiency; COPD, chronic obstructive pulmonary disease; DM, diabetes mellitus; IHD, ischemic heart disease; RI, renal insufficiency. For brain edema, brain atrophy, arteriosclerosis, the following score was used: 0: none; 1: basal, 2: moderate; 3: severe.

| **ID** | **Sex** | **Age [y]** | **Place of death** | **PMI**  **(days)** | **Cause of death** | **Co-morbidities** | **Brain weight [g]** | **Brain edema** | **Brain atrophy** | **Arterio-sclerosis** | **Macro-scopic findings** |
| --- | --- | --- | --- | --- | --- | --- | --- | --- | --- | --- | --- |
| COVID-19 | | | | | | | | | | | |
| 1 | f | 85 | hosp. | 0 | pneumonia | atrial fibrillation, CI, IHD, myelofibrosis, RI | 1240 | 0 | 1 | 2 | fresh infarction in territory of ACP |
| 2 | f | 87 | home | 1 | pneumonia | CI, COPD | 1180 | 0 | 1 | 3 | none |
| 3 | f | 87 | NH | 0 | pneumonia | COPD, dementia, IHD, RI | 1215 | 0 | 1 | 2 | none |
| 4 | m | 70 | hosp. | 1 | pneumonia (aspiration) | CI, COPD, IHD, Parkinson's disease | 1430 | 1 | 0 | 3 | none |
| 5 | m | 76 | ICU | 3 | sepsis, aortic valve endocarditis, pneumonia | AML, cardiomyopathy, thyroid cancer | 1270 | 0 | 1 | 1 | none |
| 6 | m | 90 | NH | 2 | pneumonia | atrial fibrillation, dementia, DM, history of stroke | 1015 | 0 | 2 | 3 | old infarctions in territory of ACP |
| Controls | | | | | | | | | | | |
| 1 | f | 86 | hosp. | 6 | cardiac failure | cardiomyopathy | 1180 | 1 | 1 | 1 | none |
| 2 | f | 86 | hosp. | 4 | cardiac failure | DM, IHD | 1538 | 2 | 0 | 3 | none |
| 3 | f | 87 | hosp. | 3 | myocardial infarction | cardiomyopathy | 1270 | 1 | 0 | 1 | none |
| 4 | m | 70 | hosp. | 3 | myocardial infarction | CI, liver cirrhosis | 1301 | 1 | 0 | 2 | none |
| 5 | m | 76 | hosp. | 3 | pneumonia | myocardial infarction | 1250 | 0 | 1 | 1 | none |
| 6 | m | 88 | hosp. | 3 | cardiac failure | CI, cardiomyopathy | 1420 | 1 | 0 | 1 | none |

**Extended data Table 2:** List of primary antibodies used, IF: immunofluorescence on cryosections (cryo), fixed cells (cells), or fixed vibratome sections (vibratome); IHC-P: immunohistochemistry on human paraffin sections; IB: immunoblotting.

| **Target** | **Company (catalogue no.)** | **Dilution (final concentration)** | **RRID** | **Usage** |
| --- | --- | --- | --- | --- |
| 2A | Millipore (ABS31) | 1:1000 | AB_10615498 | IB |
| ACE2 | R&D Systems (AF3437) | 1:100 (2 µg/ml) | AB_2223140 | IF, vibratome |
| Actin | Millipore (MAB1501) | 1:5000 | AB_2223041 | IB |
| Albumin | Bethyl (A90-134) | 1:16,000 | AB_67120 | IB |
| Caveolin-1 | Cell Signaling (3267) | 1:400 | AB_2275453 | IF, vibratome |
| CD13 | R&D Systems (AF2335) | 1:200 (1 µg/ml) | AB_2227288 | IF, vibratome |
| CD147 | Abcam (ab34016) | 1:200 (5 µg/ml) | AB_726136 | IF, vibratome |
| CD31 | BD-Pharmingen (553370) | 1:500 (1.0 µg/ml) | AB_394816 | IF, cryo |
| CD31 | Bio Rad (MCA2388) | 1:200 (5 µg/ml) | AB_2161024 | IF, vibratome |
| CD34 | Leica (NCL-L-END) | 1:50 (5.2 µg/ml) | AB_563552 | IHC-P |
| Cleaved Caspase-3 | Cell Signalling (9664S) | 1:400 | AB_2070042 | IF, vibratome |
| Collagen IV | Abcam (ab6586) | 1:1000 | AB_305584 | IF, cryo |
| Collagen IV | Bio Rad (134001) | 1:200 (2 µg/ml) | AB_2082646 | IF, cryo, IHC-P, vibratome, |
| ERG | Abcam (ab92513) | 1:200 (4.4 µg/ml) | AB_2630401 | IF, cryo |
| GFAP | Dako (Z033429-2) | 1:1000 (3.2 µg/ml) | Not available | IF, vibratome |
| HA-tag | Santa Cruz (sc-805) | 1:500 (0.4µg/ml) | AB_631618 | IB |
| Iba1 | Wako (019-19741) | 1:400 | AB_839504 | IF, vibratome |
| Iba1 | Abcam (ab5076) | 1:800 (0.63 µg/ml) | AB_2224402 | IF, vibratome |
| NEMO | Santa Cruz (sc-8330) | 1:500 | AB_2124846 | IB |
| NEMO | Abcam (ab244244) | 1:500 (0.4 µg/ml) | Not available | IB |
| Neuropilin-1 | R&D Systems (AF566) | 1:100 (2 µg/ml) | AB_355445 | IF, vibratome |
| Mpro (Nsp5) | Novus Biologicals (NBP1-78110) | 1:10.000 (0.5 µg/ml) | AB_11014870 | IB |
| Occludin | ThermoFisher (71-1500) | 1:200 (1.25 µg/ml) | AB_2533977 | IF, vibratome |
| p65 | Santa Cruz (sc-8008) | 1:200 (2 µg/ml) | AB_628017 | IF, cells |
| PDGFRβ | Cell Signaling (3169) | 1:200 | AB_2162497 | IF, vibratome |
| Pimonidazole | Hypoxyprobe Inc. (PAb2627AP) | 1:500 (1 µg/ml) | Not available | IF, vibratome |
| Smooth muscle actin | Millipore (C6198-100UL) | 1:100 (15 µg/ml) | AB_476856 | IF, vibratome |
| ZO-1 | ThermoFisher (14-9776-82) | 1:200 (2.5 µg/ml) | AB_2573026 | IF, vibratome |

**Extended data Table 3:** List of secondary antibodies used, IF: immunofluorescence; IHC-P: immunohistochemistry on human paraffin sections; STED: stimulated emission depletion microscopy; IB: immunoblotting.

| **Target (coupled to)** | **Company (catalogue no.)** | **Dilution (final concentration)** | **RRID** | **Usage** |
| --- | --- | --- | --- | --- |
| goat IgG (Alexa Fluor 647) | ThermoFisher (A-21447) | 1:400 (5 µg/ml) | AB_2535864 | IF, IHC-P |
| goat IgG (Cy3) | Jackson (705-165-147) | 1:400 (3.75 µg/ml) | AB_2307351 | IF |
| Goat IgG (HRP) | DakoCytomati (P0160) | 1:2000 | Not available | IB |
| goat IgG (StarRed) | Abberior (STRED-1055-500UG) | 1:250 | AB_2861383 | IF, STED |
| mouse IgG (Alexa Fluor 488) | ThermoFisher (A-21202) | 1:400 (5 µg/ml) | AB_141607 | IHC-P |
| mouse IgG (Alexa Fluor 594) | ThermoFisher (A-21203) | 1:100 (20 µg/ml) | AB_2535789 | IF |
| mouse IGG (Cy3) | Jackson (715-165-151) | 1:200 | AB_2315777 | IF |
| mouse IgG (HRP) | Santa Cruz (sc-2005) | 1:2500 (0.16 µg/ml) | AB_631736 | IB |
| rabbit IgG (Alexa Fluor 488) | ThermoFisher (A-21206) | 1:400 (5 µg/ml) | AB_2535792 | IF |
| rabbit IgG (Alexa Fluor 647) | ThermoFisher (A-31573) | 1:400 (5 µg/ml) | AB_2536183 | IF |
| rabbit IgG (Cy3) | Jackson (711-165-152) | 1:400 (3.75 µg/ml) | AB_2307443 | IF |
| rabbit IgG (HRP) | Santa Cruz (sc2301) | 1:5000 (0.08 µg/ml) | AB_650500 | IB |
| rat IgG (Alexa Fluor 488) | ThermoFisher (A-21208) | 1:400 (5 µg/ml) | AB_2535794 | IF |
| rat IgG (Cy3) | Jackson (712-165-150) | 1:400 (3.75 µg/ml) | AB_2340666 | IF |
| rat IgG (StarORANGE) | Abberior (STORANGE-1007-500UG) | 1:500 | AB_2833017 | IF, STED |

**Extended data Figure Legends**

**Extended data Fig. 1: Clustering of brain cells according to single-cell RNA sequencing.**

**a,** UMAP plot of 5,611 brain cells. Clusters were annotated by marker genes for the specific cell type. **b,** Violin plots of marker genes used for annotation. **c-e,** mRNA expression patterns of the putative SARS-CoV-2 receptors *Cd209a* (c), *Cd209c* (d), and *Tmprss2* (e). There were no *Cd209b* or *Cd209d* expressing cells. VLMC, vascular and leptomeningeal cells; OPC, oligodendrocyte progenitor cells.

**Extended data Fig. 2: Time dependence of NEMO cleavage by Mpro.**

Cleavage of human NEMO by SARS-CoV-2 Mpro (0, 5, 10, 25 µM) depended on the incubation time. NEMO (with GST tag) or the cleavage products were detected by immunoblotting. The red-boxed part of the blot is shown in Fig. 2a.

**Extended data Fig. 3: Cleavage of NEMO in cell extracts.**

**a,** Cell lysates of the human brain endothelial cell line hCMEC/D3 were incubated with Mpro (25 µM) for different times and blotted against NEMO and Mpro. **b,** HEK293T cells were transfected with a plasmid encoding for the mouse NEMO linked to GFP via a 2A sequence. After lysing the cells, Mpro (25 µM) was added and incubated for the indicated times. Antibodies against the 2A linker were used to identify NEMO and its cleavage products. **c,** hCMEC/D3 cells were transfected with the same plasmid as described in b (pNEMO-2A-GFP) and additionally with an empty control plasmid or a plasmid containing the HA-tagged form of the SARS-CoV-2 Mpro protease. After 2 days, cells were lysed and blotted against NEMO, 2A, Mpro, and actin. The number of GFP expressing cells did not differ between control and Mpro plasmids as shown in the right panels. The red-boxed part of the blots is shown in Fig. 2c. Scale bar, 100 µm.

**Extended data Fig. 4: Tryptic digestion and MS analysis showing that human NEMO is cleaved by Mpro** **at Q83, Q205, Q231, Q304, and Q313.**

**a,** Extracted ion chromatogram (EIC) of the tryptic peptide 74ERCEELLHFQ83 (m/z, 680.82103+; retention time [RT], 18.6 min) derived from NEMO that was treated with Mpro (5 µM) and its MS/MS spectrum. **b,** EIC of the tryptic peptide 76CEELLHFQ83 (m/z, 538.24842+; RT, 20.6 min) derived from NEMO that was treated with Mpro (5 µM) and its MS/MS spectrum. **c,** EIC of the tryptic peptide 84ASQREEKEFLMCK96 (m/z, 828.39802+; RT, 13.1 min) derived from NEMO that was treated with Mpro (5 µM) and its MS/MS spectrum. **d,** EIC of the tryptic peptide 206GQSVEAALR214 (m/z, 465.75502+; RT, 12.7 min) derived from NEMO that was treated with Mpro (5 µM) and its MS/MS spectrum. **e,** EIC of the tryptic peptide 206GQSVEAALRMER217 (m/z, 673.84672+; RT, 15.9 min) derived from NEMO that was treated with Mpro (5 µM) and its MS/MS spectrum. **f,** EIC of the tryptic peptide 226KLAQLQ231 (m/z, 350.72152+; RT, 10.7 min) derived from NEMO that was treated with Mpro (5 µM) and its MS/MS spectrum. **g,** EIC of the tryptic peptide 232VAYHQLFQEYDNHIK246 (m/z, 635.98323+; RT, 18.4 min) derived from NEMO that was treated with Mpro (5 µM) and its MS/MS spectrum. **h,** EIC of the tryptic peptide 305ADIYK309 (m/z, 305.16632+; RT, 7.7 min) derived from NEMO that was treated with Mpro (5 µM) and its MS/MS spectrum. **i,** EIC of the tryptic peptide 305ADIYKADFQAER316 (m/z, 713.85242+; RT, 14.9 min) derived from NEMO that was treated with Mpro (5 µM) and its MS/MS spectrum. **j,** EIC of the tryptic peptide 303AQADIYKADFQ313 (m/z, 635.30972+; RT, 16.6 min) derived from NEMO that was treated with Mpro (5 µM) and its MS/MS spectrum. **k,** Protein sequence of human NEMO (Genebank ID: AAC36330.1), in which the five cleavage sites are labeled.

**Extended data Fig. 5: Sequence specificity and catalytic efficiency of NEMO cleavage by Mpro.**

**a,** Extracted ion chromatogram (EIC) of the peptide 232VAYHQLFQEY241 (m/z, 649.31492+; retention time [RT], 7.0 min) after incubation of the synthetic peptide h-NEMO_222-241 (EEKRKLAQLQVAYHQLFQEY) without and with Mpro (2.5 µM) and its MS/MS spectrum. **b,** EIC of the peptide 222EEKRKLAQLQ231 (m/z, 414.91043+; RT, 5.1 min) after incubation of the synthetic peptide m-NEMO_222-241 (EEKRKLAQLQAAYHQLFQDY) without and with Mpro (2.5 µM) and its MS/MS spectrum. **c,** EIC of the peptide 232AAYHQLFQDY241 (m/z, 628.29152+; RT, 6.9 min) after incubation of the synthetic peptide m-NEMO_222-241 (EEKRKLAQLQAAYHQLFQDY) without and with Mpro (2.5 µM) and its MS/MS spectrum. **d,** Determination of the apparent catalytic efficiency kcat/KM by incubating the synthetic peptide h-NEMO_222-241 (EEKRKLAQLQVAYHQLFQEY) with Mpro (2.5 µM). The concentration of proteolysis product h-NEMO_222-231 was quantified by LC-MS/MS, using synthetic peptide h-NEMO_222-231 for calibration, and was converted to initial reaction rate. Initial reaction rates were normalized by the concentration of Mpro and plotted against substrate concentrations. The apparent kcat/KM was obtained from the slope of the curve. Experiments were performed as biological triplicates.

**Extended data Fig. 6: Transduction of mice with AAV-BR1-Mpro.**

Accumulation of genomic particles (gp) in PFA-fixed brains of mice, two weeks after AAV-BR1-Mpro (1.8x1011 gp, 100 µl, i.v.) or AAV-BR1-GFP (control, 1.8x1011 gp, 100 µl, i.v.) injection. Genomic particles were quantified by q-PCR directed. Data are shown as means ± SEM.

**Extended data Fig. 7: String vessels have a tube-like structure and occur in the deeper part of the vascular tree.**

**a,** Super-resolution imaging of mouse and human string vessels. In confocal mode with the pinhole closed to 0.4 AU, the string vessels appeared as solid collagen tubes. However, STED microscopy demonstrated a tube-like structure of both the mouse and human string vessels. In both species, the apparent diameter is about 200 nm with the collagen walls having a similar thickness. Scale bar, 1 µm.

**b,** String vessels were tracked in confocal 3D scans of the cortex using a multicolor staining against CD31, collagen IV and smooth muscle actin (α-SMA) (left). Since α-SMA is expressed in arteries and arterioles (middle), the branching order can be determined (right). String vessels positive for α-SMA are defined as arterial string vessels, adjacent string vessels as 1st capillary string vessels, etc. (right).

**c,** Tracking of string vessels in the hippocampus and hypothalamus of *NemobeKO* mice is shown. Repeated measures ANOVA followed by Sidak’s post-hoc test (hippocampus: genotype: *F* (1,4) = 99.7, *p* < 0.001; branch order: *F* (1.2,4.9) = 160.3, *p* < 0.001; interaction: *F* (4,16) = 94.0, *p* < 0.001; hypothalamus: genotype: *F* (1,4) = 35.1, *p* = 0.004; branch order: *F* (4,16) = 74.7, *p* < 0.001; interaction: *F* (4,16) = 14.6, *p* < 0.001; N = 3 animals/group). All data are shown as means ± SEM, **p* < 0.05, ***p* < 0.01.

**Extended data Fig. 8: Ablation of microglia did not improve the microvascular pathology in mice with endothelial NEMO deficiency.**

**a,** Representative images show the effect of administering the CSF-1R antagonist PLX5622 (PLX) on microglia in *Nemofl* and *NemobeKO* animals. Scale bar, 100 µm. **b,** Compared to the control diet, the density of microglial cells was strongly reduced in all genotypes (genotype: *F* (1,16) = 18.9, *p* < 0.001; treatment: *F* (1,16) = 764.7, *p* < 0.001; interaction: *F* (1,16) = 5.5, *p* = 0.033, N = 4-6 animals/group). Ablating microglia did neither prevent the disruption of the BBB as shown by IgG extravasation (genotype: *χ2*(1) = 14.1, *p* < 0.005; treatment: *χ2*(1)= 0.002, *p* > 0.05; interaction: *χ2*(1) = 0.01, *p* > 0.05, Scheirer-Ray-Hare test; N = 4-6 animals/group), the formation of string vessels (genotype: *χ2*(1) = 9.5, *p* < 0.005; treatment: *χ2*(1) = 0.8, *p* > 0.05; interaction: *χ2*(1) = 0.6, *p* > 0.05, Scheirer-Ray-Hare test; N = 3-6 animals/group), nor the activation of astrocytes (genotype: *χ2*(1) = 13.9, *p* < 0.005; treatment: *χ2*(1) = 1.0, *p* > 0.05; interaction: *χ2*(1) = 0.7, *p* > 0.05, Scheirer-Ray-Hare test; N = 4-6 animals/group). All data are shown as means ± SEM, ****p* < 0.001.

**Extended data Fig. 9: Modulation of apoptosis and necroptosis pathways in mice with NEMO deficient brain endothelial cells.**

**a**, Scheme showing the role of RIPK3 and FADD in cell death caused by NEMO deficiency. TNF leads to the activation of several adaptor proteins and kinases, such as TAK1. Activation of the IκB kinase complex triggers the translocation of NF-κB into the nucleus and the expression of target genes. NEMO is the regulatory subunit of the IκB kinase complex and is essential for NF-κB pathway activation. In the absence of NEMO, TNF leads to the formation of complex IIa, complex IIb, and the necrosome and induces apoptosis or necroptosis. According to current concepts19, apoptosis is mediated by FADD and RIPK3, while necroptosis depends on RIPK3. **b,** Deletion of *Fadd* in brain endothelial cells (*FADDbeKO*) led to the formation of string vessels and reduced vessel lengths. The results obtained in *Nemofl*, *NemobeKO*, *Ripk3-/-*, and *NemobeKORipk3-/-* mice are also included in Fig. 5 of the main article. **c,** Immunoblots showing the extravasation of IgG and albumin into the brain tissue. **d,** Quantification of the immunoblots normalized for actin levels demonstrated a disruption of the BBB in FADD-deficient mice as shown by the extravasation of IgG and albumin. **e,** Brain weights hint at higher water content in FADD deficient mice. **f,** *NemobeKOFADDbeKO* mice died within 9 days after tamoxifen injection while RIPK3 deficiency prevented the death of *NemobeKO* mice. **g,** *Ripk3* deletion normalized the body weight of mice with brain endothelial NEMO deficiency, while FADD deficiency worsened body weight loss.

**References**

1. Matschke, J. Neuropathology of SARS-CoV-2: a post mortem case series. *Lancet Neurol* (2020).

2. Schmidt-Supprian, M.*, et al.* NEMO/IKK gamma-deficient mice model incontinentia pigmenti. *Mol Cell* **5**, 981-992 (2000).

3. Luedde, T.*, et al.* Deletion of NEMO/IKKgamma in liver parenchymal cells causes steatohepatitis and hepatocellular carcinoma. *Cancer Cell* **11**, 119-132 (2007).

4. Ridder, D.A.*, et al.* TAK1 in brain endothelial cells mediates fever and lethargy. *J Exp Med* **208**, 2615-2623 (2011).

5. Newton, K., Sun, X. & Dixit, V.M. Kinase RIP3 is dispensable for normal NF-kappa Bs, signaling by the B-cell and T-cell receptors, tumor necrosis factor receptor 1, and Toll-like receptors 2 and 4. *Mol Cell Biol* **24**, 1464-1469 (2004).

6. Qin, J.Y.*, et al.* Systematic comparison of constitutive promoters and the doxycycline-inducible promoter. *PLoS One* **5**, e10611 (2010).

7. Xue, X.*, et al.* Production of authentic SARS-CoV M(pro) with enhanced activity: application as a novel tag-cleavage endopeptidase for protein overproduction. *J Mol Biol* **366**, 965-975 (2007).

8. Grum-Tokars, V., Ratia, K., Begaye, A., Baker, S.C. & Mesecar, A.D. Evaluating the 3C-like protease activity of SARS-Coronavirus: recommendations for standardized assays for drug discovery. *Virus Res* **133**, 63-73 (2008).

9. Grimm, D., Kay, M.A. & Kleinschmidt, J.A. Helper virus-free, optically controllable, and two-plasmid-based production of adeno-associated virus vectors of serotypes 1 to 6. *Mol Ther* **7**, 839-850 (2003).

10. Dogbevia, G., Grasshoff, H., Othman, A., Penno, A. & Schwaninger, M. Brain endothelial specific gene therapy improves experimental Sandhoff disease. *J Cereb Blood Flow Metab* **40**, 1338-1350 (2020).

11. Xiao, X., Li, J. & Samulski, R.J. Production of high-titer recombinant adeno-associated virus vectors in the absence of helper adenovirus. *J Virol* **72**, 2224-2232 (1998).

12. Dogbevia, G.K.*, et al.* Gene therapy decreases seizures in a model of Incontinentia pigmenti. *Ann Neurol* **82**, 93-104 (2017).

13. Körbelin, J.*, et al.* A brain microvasculature endothelial cell-specific viral vector with the potential to treat neurovascular and neurological diseases. *EMBO Molecular Medicine* **8**, 609-625 (2016).

14. Fan, H.C., Fu, G.K. & Fodor, S.P. Expression profiling. Combinatorial labeling of single cells for gene expression cytometry. *Science* **347**, 1258367 (2015).

15. Zhang, L.*, et al.* Crystal structure of SARS-CoV-2 main protease provides a basis for design of improved alpha-ketoamide inhibitors. *Science* **368**, 409-412 (2020).

16. Munawar, A.*, et al.* Elapid Snake Venom Analyses Show the Specificity of the Peptide Composition at the Level of Genera Naja and Notechis. *Toxins* **6**, 850-868 (2014).

17. Gaehtgens, P. Flow of blood through narrow capillaries: rheological mechanisms determining capillary hematocrit and apparent viscosity. *Biorheology* **17**, 183-189 (1980).

18. Hunziker, O., Abdel'Al, S. & Schulz, U. The aging human cerebral cortex: a stereological characterization of changes in the capillary net. *J Gerontol* **34**, 345-350 (1979).

19. Kondylis, V., Kumari, S., Vlantis, K. & Pasparakis, M. The interplay of IKK, NF-kappaB and RIPK1 signaling in the regulation of cell death, tissue homeostasis and inflammation. *Immunol Rev* **277**, 113-127 (2017).
